# Supplementary material for: Studying the droplet sliding velocity and charge transfer at a liquid–solid interface
Source: Royal Society of Chemistry journal article supplement (doi:10.1039/d2ta09797d), 2023-01-01
Supplement: d2ta09797d1.pdf [file d2ta09797d1.pdf]

## Supporting Information

### Studying the Droplet Sliding Velocity on the Charge Transfer at Liquid-Solid Interface

*Xuejiao Wang*<sup>1,2#</sup>, *Jinyang Zhang*<sup>2,3,#</sup>, *Xin Liu*<sup>2,4</sup>, *Shiquan Lin*<sup>2,3</sup>, and *Zhong Lin Wang*<sup>2,3,5,\*</sup>

1. Center on Nanoenergy Research, School of Physical Science and Technology, Guangxi University, Nanning, Guangxi 530004, P.R. China
2. Beijing Institute of Nanoenergy and Nanosystems, Chinese Academy of Sciences, Beijing 100083, P. R. China
3. School of Nanoscience and Technology, University of Chinese Academy of Sciences, Beijing 100049, P. R. China
4. College of engineering, Zhejiang Normal University, Zhejiang 321000, P. R. China
5. School of Materials Science and Engineering, Georgia Institute of Technology, Atlanta, GA 30332-0245, USA

E-mail: zlwang@gatech.edu

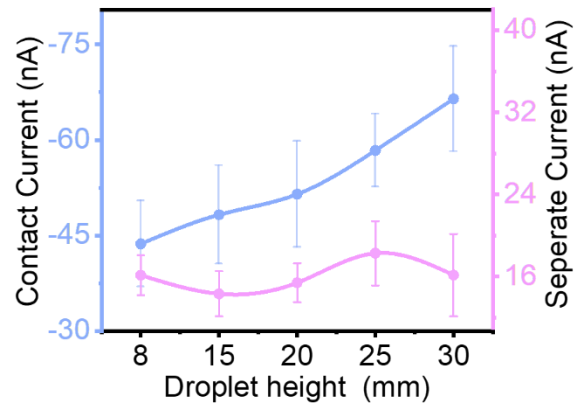

**Figure S1.** Contact and separation currents generated by droplets dropping at different heights when sliding through the FEP film.

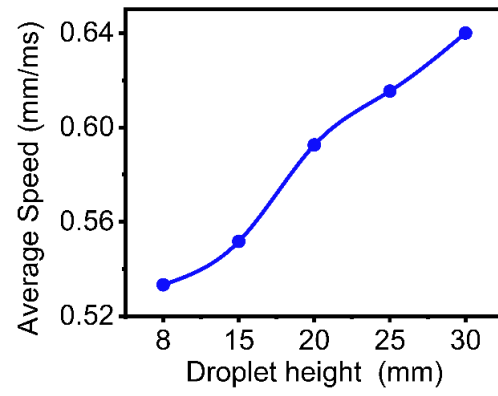

**Figure S2.** The relationship between slip velocity and drop height.

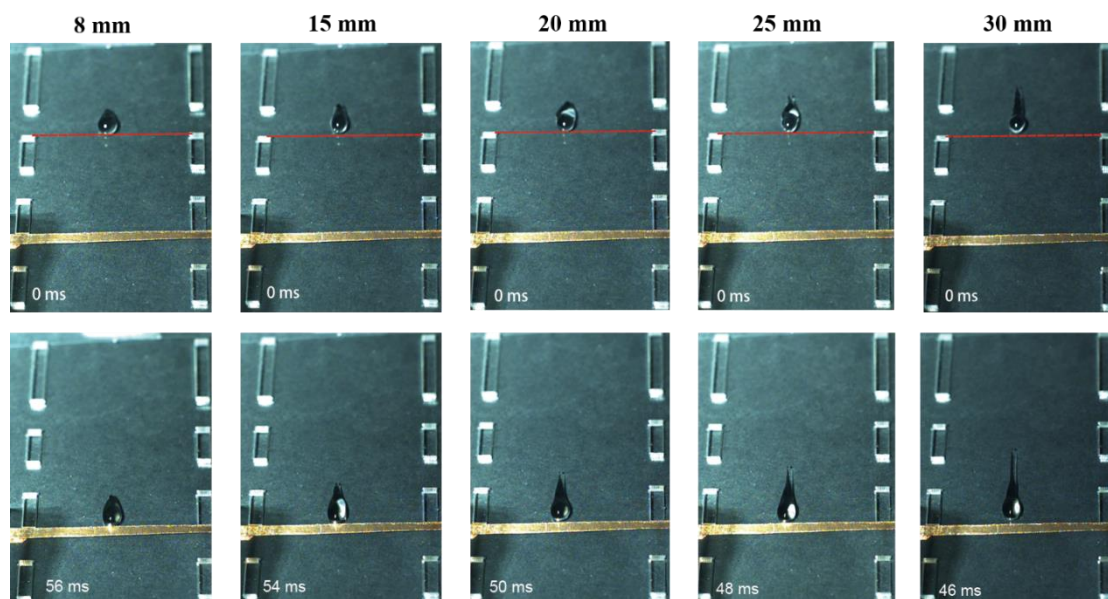

**Figure S3.** The high-speed camera captures the time it takes for droplets to slide down a distance when they drop from different heights.

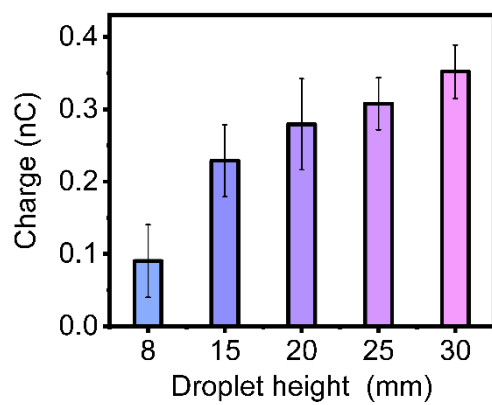

**Figure S4.** Transferred charges of water droplets sliding at different heights on PTFE films.

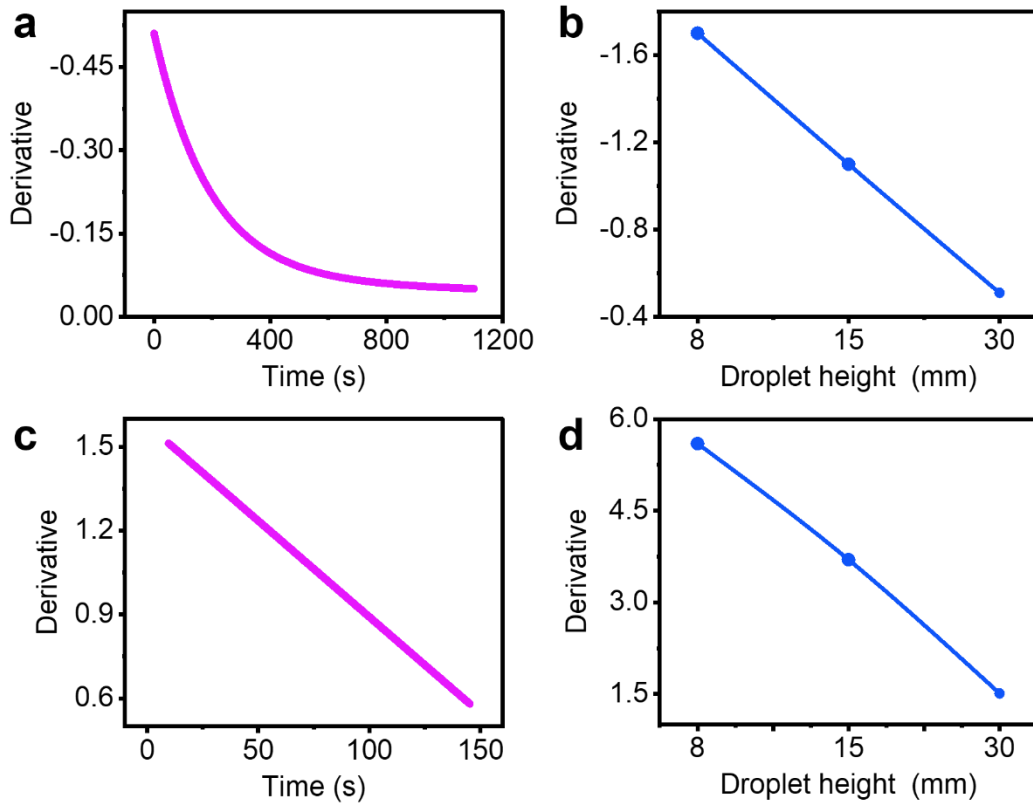

**Figure S5.** (a) Charge saturation rate at a drop height of 30 mm. (b) Comparison of charge saturation rates at three drop heights. (c and d) Voltage saturation rate of droplet slip at 30 mm height and comparison of voltage saturation rate at different drop heights.

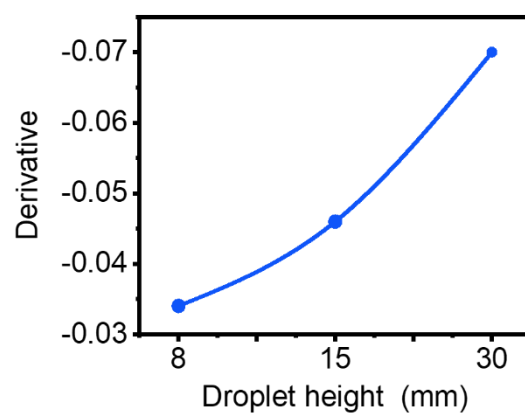

**Figure S6.** The slope of the line obtained by fitting the relationship between the concentration of NaCl solution and the amount of transferred charges at different drop heights.

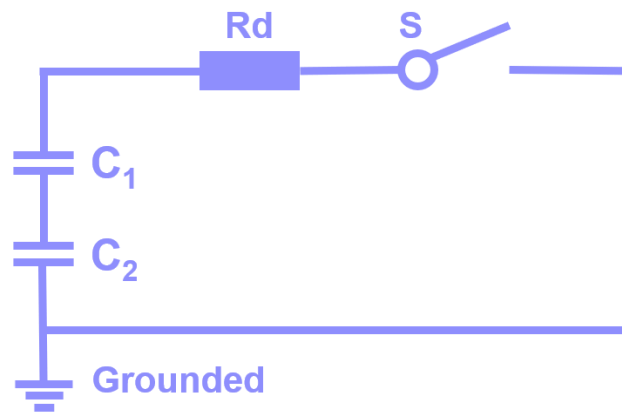

**Figure S7.** The equivalent circuit when droplet contacts the FEP surface, the switch  $S$  is closed.
